# Supplementary material
Source: PubMed Central journal article supplement (PMC6520187)
Supplement: NIHMS1024122-supplement-1.pdf [file NIHMS1024122-supplement-1.pdf]

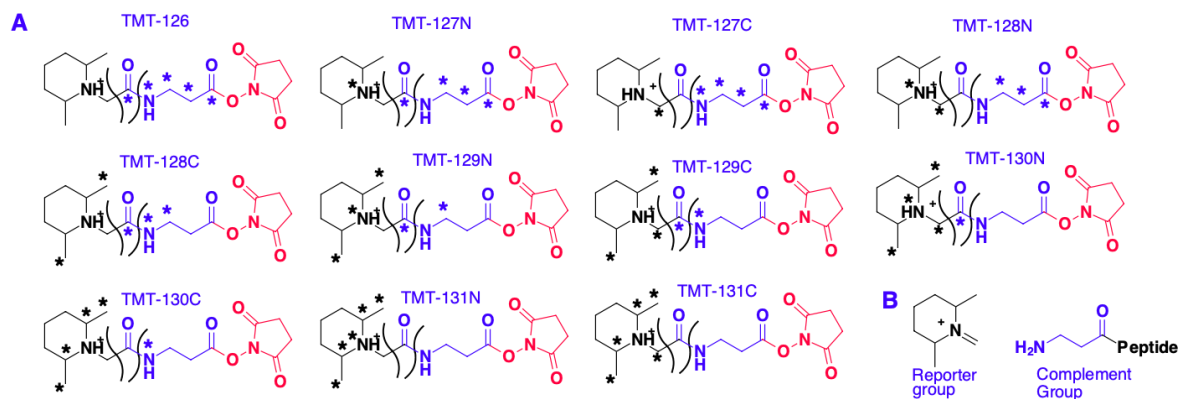

**Figure S1: Distribution of heavy isotopes between reporter and balancing group for the 11 different TMTs.** A) Asterisks indicate heavy isotopes. The reporter region is shown in black, the balancing region in blue, and the leaving group in red. The TMT 11-plex has five potentially heavy isotopes on both the reporter and mass balancer groups. Due to the 6 mDa difference of the extra neutron in C14 compared to N15 the reporter ions from e.g. TMT-127N are distinguishable from TMT-127C. The 11th variant in the TMT 11-plex contains five heavy carbons in the reporter ion and is technically not isobaric to the other tags. However, in practice this will not make a difference for its use. B) Reporter and Complement Reporter Ions forming after TMT-tag fragmentation.
